# Supplementary material
Source: publisher figshare collection journal article supplement (https://frontiersin.figshare.com/ndownloader/files/24061037)
Supplement: Supplementary file 1 [file 24061037]

Supplementary Material

Table S1. Results of goodness of fit and predictions of the RAC-BRT models applied to European sardine (*Sardina pilchardus*)occurrence collected during the dermal survey (MEDITS) in the Geographical Sub-Area 06 and 07 from 2003 to 2016. D2 (%) = total percentage of deviance explained by the model; rho = Pearson’s correlation index between observed and predicted values; I = Moran’s index maximum absolute value for each model and associated P-value.

| GSA07 | | | | |
| --- | --- | --- | --- | --- |
| Year | RAC-BRT D2 (%) | rho | Moran’s I | Moran P-value |
| 2003 | 72 | 0.73 | 0.05 | < 2.2e-16 |
| 2004 | 70 | 0.76 | 0.04 | < 2.2e-16 |
| 2005 | 68 | 0.79 | 0.05 | < 2.2e-16 |
| 2006 | 63 | 0.75 | 0.06 | < 2.2e-16 |
| 2007 | 74 | 0.82 | 0.05 | < 2.2e-16 |
| 2008 | 68 | 0.77 | 0.04 | < 2.2e-16 |
| 2009 | 74 | 0.79 | 0.05 | < 2.2e-16 |
| 2010 | 54 | 0.68 | 0.05 | < 2.2e-16 |
| 2011 | 63 | 0.67 | 0.05 | < 2.2e-16 |
| 2012 | 74 | 0.82 | 0.05 | < 2.2e-16 |
| 2013 | 69 | 0.82 | 0.05 | < 2.2e-16 |
| 2014 | 73 | 0.78 | 0.05 | < 2.2e-16 |
| 2015 | 51 | 0.71 | 0.05 | < 2.2e-16 |
| 2016 | 67 | 0.64 | 0.05 | < 2.2e-16 |
| GSA06 | | | | |
| 2003 | 58 | 0.69 | 0.05 | < 2.2e-16 |
| 2004 | 62 | 0.73 | 0.05 | < 2.2e-16 |
| 2005 | 62 | 0.74 | 0.05 | < 2.2e-16 |
| 2006 | 73 | 0.76 | 0.06 | < 2.2e-16 |
| 2007 | 68 | 0.78 | 0.05 | < 2.2e-16 |
| 2008 | 72 | 0.74 | 0.06 | < 2.2e-16 |
| 2009 | 69 | 0.76 | 0.05 | < 2.2e-16 |
| 2010 | 66 | 0.86 | 0.06 | < 2.2e-16 |
| 2011 | 77 | 0.93 | 0.05 | < 2.2e-16 |
| 2012 | 78 | 0.90 | 0.06 | < 2.2e-16 |
| 2013 | 50 | 0.70 | 0.05 | < 2.2e-16 |
| 2014 | 58 | 0.83 | 0.05 | < 2.2e-16 |
| 2015 | 64 | 0.80 | 0.05 | < 2.2e-16 |
| 2016 | 52 | 0.75 | 0.06 | < 2.2e-16 |

Table S2. Results of goodness of fit and predictions of the RAC-BRT models applied to European anchovy (*Engraulis encrasicolus*)collected during the dermal survey (MEDITS) in the Geographical Sub-Area 06 and 07 from 2003 to 2016. D2 (%) = total percentage of deviance explained by the model; rho = Pearson’s correlation index between observed and predicted values; I = Moran’s index maximum absolute value for each model and associated P-value.

| GSA07 | | | | |
| --- | --- | --- | --- | --- |
| Year | RAC-BRT D2 (%) | rho | Moran’s I | Moran P-value |
| 2003 | 65 | 0.84 | 0.06 | < 2.2e-16 |
| 2004 | 68 | 0.80 | 0.06 | < 2.2e-16 |
| 2005 | 42 | 0.66 | 0.05 | < 2.2e-16 |
| 2006 | 50 | 0.77 | 0.06 | < 2.2e-16 |
| 2007 | 62 | 0.85 | 0.05 | < 2.2e-16 |
| 2008 | 71 | 0.87 | 0.06 | < 2.2e-16 |
| 2009 | 75 | 0.82 | 0.05 | < 2.2e-16 |
| 2010 | 66 | 0.80 | 0.06 | < 2.2e-16 |
| 2011 | 72 | 0.85 | 0.05 | < 2.2e-16 |
| 2012 | 38 | 0.67 | 0.06 | < 2.2e-16 |
| 2013 | 34 | 0.62 | 0.05 | < 2.2e-16 |
| 2014 | 72 | 0.90 | 0.06 | < 2.2e-16 |
| 2015 | 59 | 0.82 | 0.05 | < 2.2e-16 |
| 2016 | 43 | 0.74 | 0.06 | < 2.2e-16 |
| GSA06 | | | | |
| 2003 | 55 | 0.75 | 0.06 | < 2.2e-16 |
| 2004 | 52 | 0.74 | 0.06 | < 2.2e-16 |
| 2005 | 58 | 0.76 | 0.05 | < 2.2e-16 |
| 2006 | 53 | 0.77 | 0.06 | < 2.2e-16 |
| 2007 | 48 | 0.75 | 0.05 | < 2.2e-16 |
| 2008 | 48 | 0.73 | 0.06 | < 2.2e-16 |
| 2009 | 51 | 0.76 | 0.05 | < 2.2e-16 |
| 2010 | 66 | 0.86 | 0.06 | < 2.2e-16 |
| 2011 | 77 | 0.93 | 0.05 | < 2.2e-16 |
| 2012 | 78 | 0.90 | 0.06 | < 2.2e-16 |
| 2013 | 50 | 0.70 | 0.05 | < 2.2e-16 |
| 2014 | 58 | 0.83 | 0.06 | < 2.2e-16 |
| 2015 | 64 | 0.80 | 0.05 | < 2.2e-16 |
| 2016 | 52 | 0.75 | 0.06 | < 2.2e-16 |


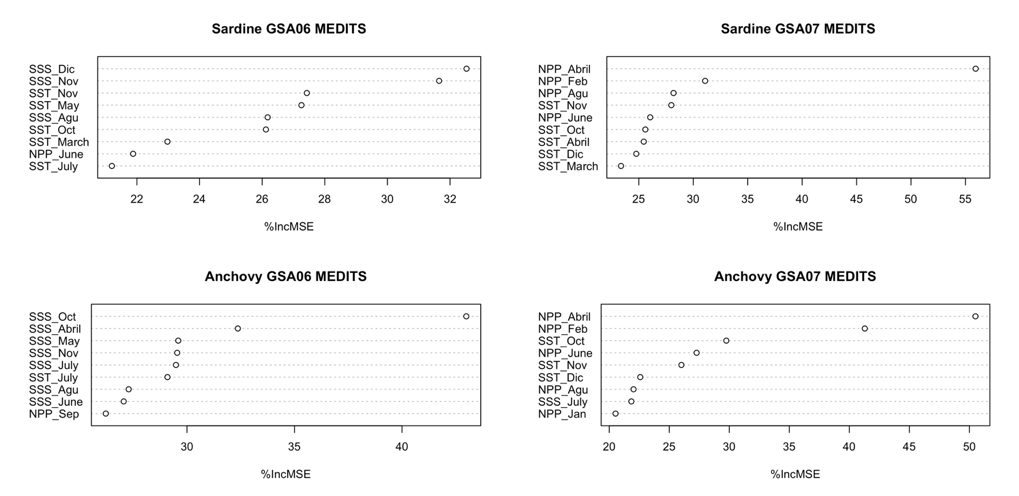


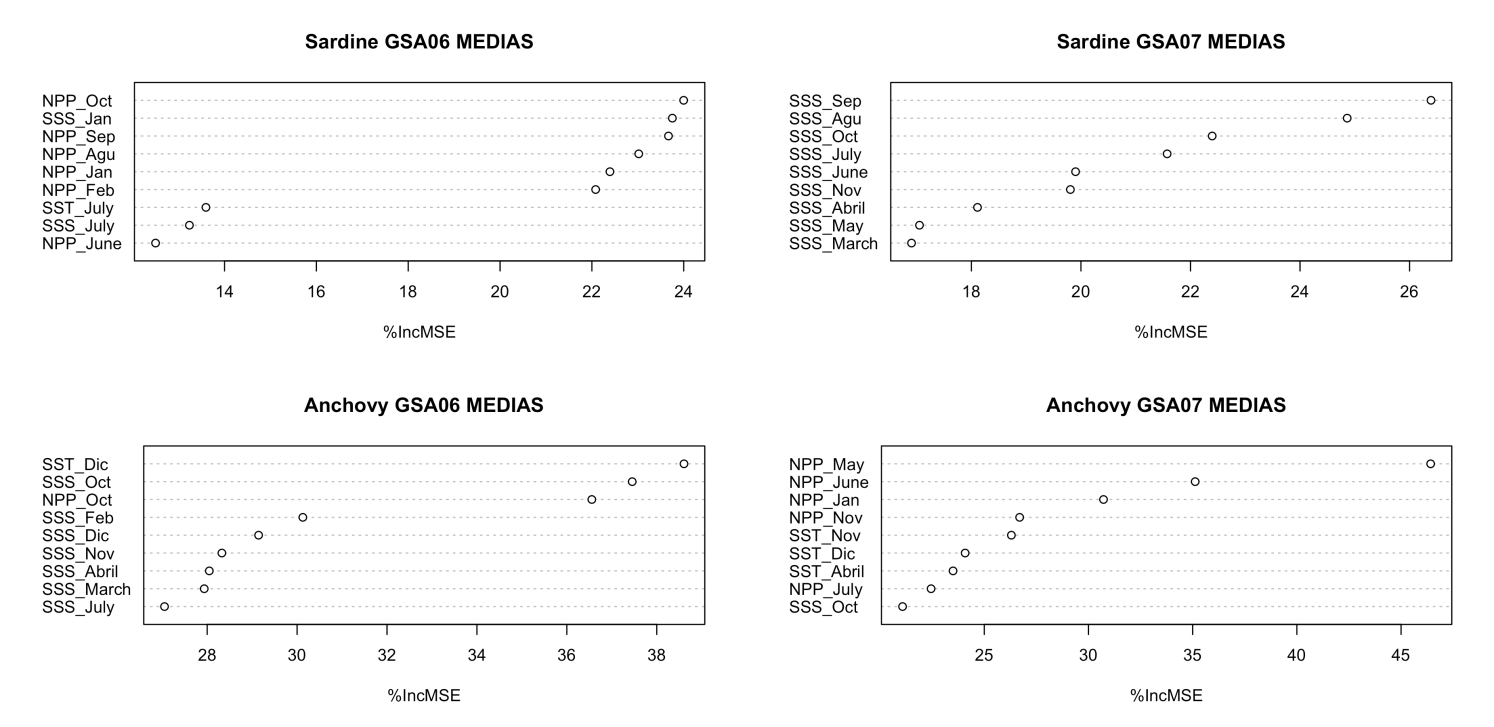


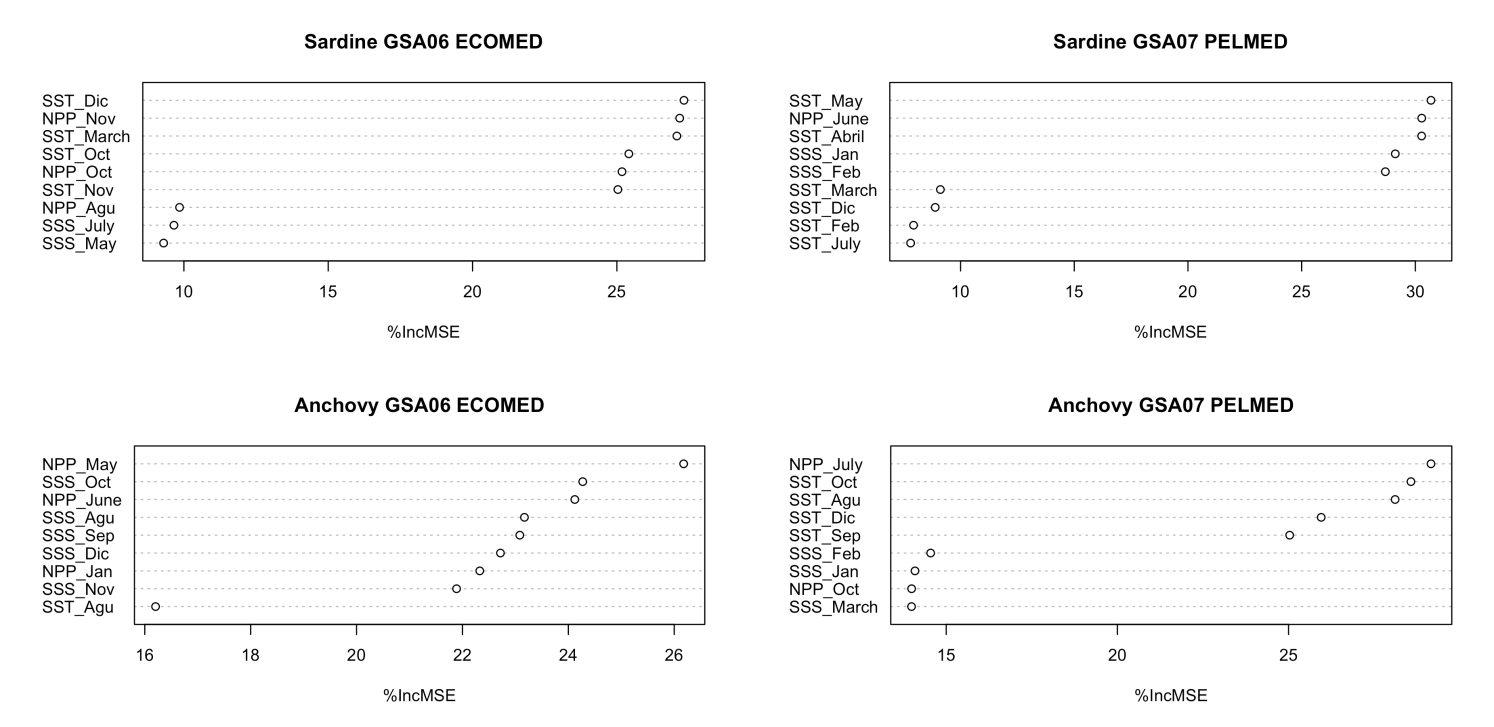


Figure S1: Variable importance analysis performed by Random Forests based on the per cent increase in mean squared error- MSE for the used variables. Random Forests were performed for European sardine (*Sardina pilchardus*) and anchovy (*Engraulis encrasicolus*) abundance indexes collected during acoustic (ECOMED, PELMED and MEDIAS) and demersal (MEDITS) surveys in the Geographical Sub-Area 06 and 07 from 2003 to 2016. Predictors used were Sea Surface Temperature (SST in °C), Sea Surface Salinity (SSS in PSU) and Net Primary Productivity (NPP in mg/m3). Moreover, 12 temporal lags (from January to December) were tested to assess if the species were more influenced by the environmental features of the months previous the surveys.


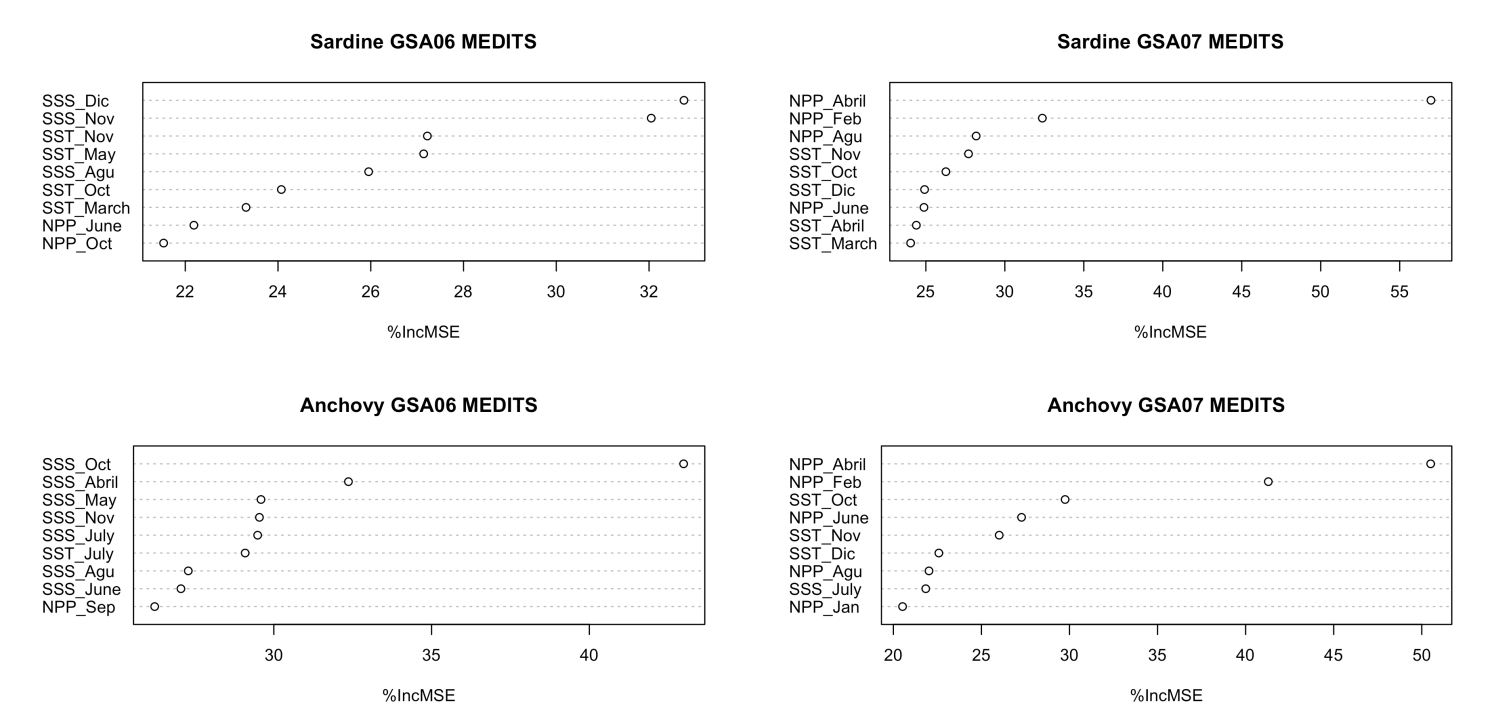

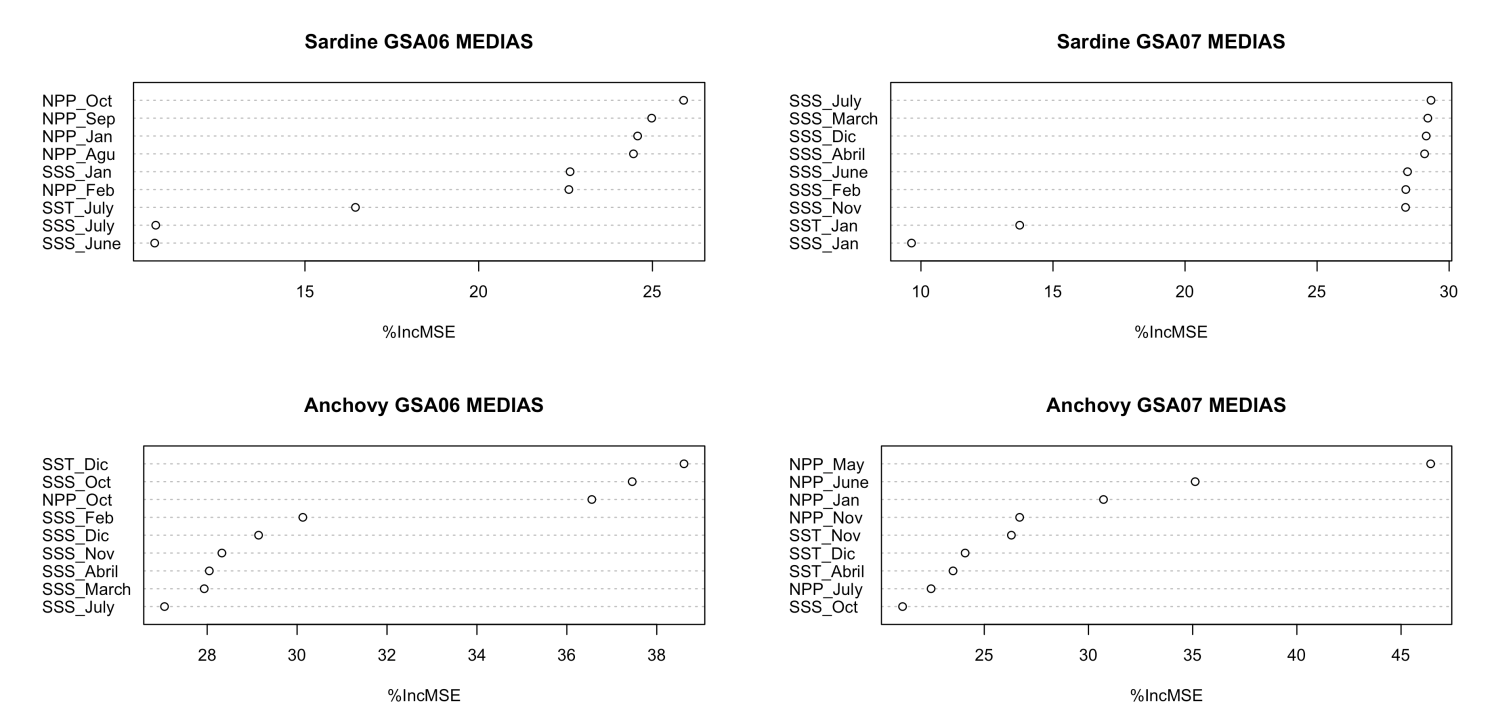

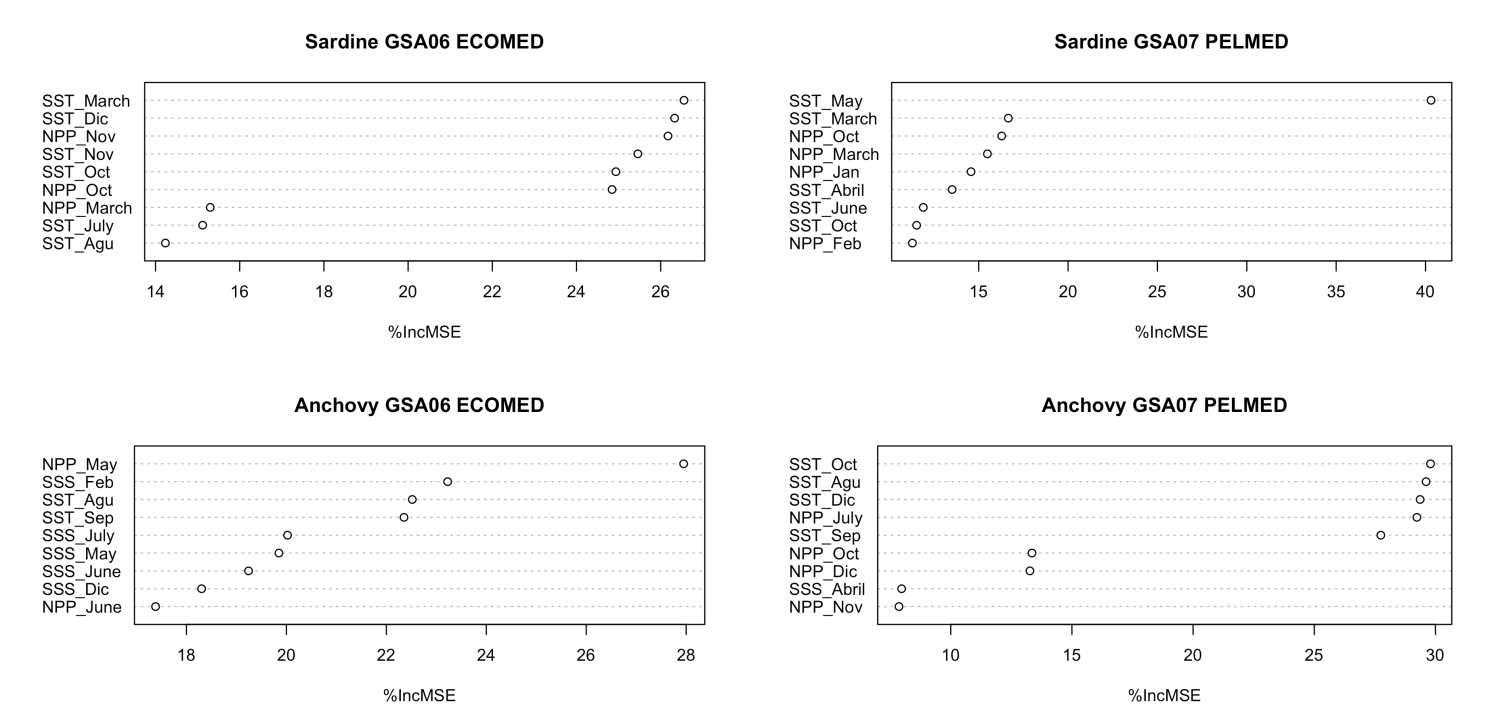


Figure S2: Variable importance analysis performed by Random Forests based on the per cent increase in mean squared error- MSE for the used variables. Random Forests were performed for European sardine (*Sardina pilchardus*) and anchovy (*Engraulis encrasicolus*) biomass indexes collected during acoustic (ECOMED, PELMED and MEDIAS) and demersal (MEDITS) surveys in the Geographical Sub-Area 06 and 07 from 2003 to 2016. Predictors used were Sea Surface Temperature (SST in °C), Sea Surface Salinity (SSS in PSU) and Net Primary Productivity (NPP in mg/m3). Moreover, 12 temporal lags (from January to December) were tested to assess if the species were more influenced by the environmental features of the months previous the surveys.


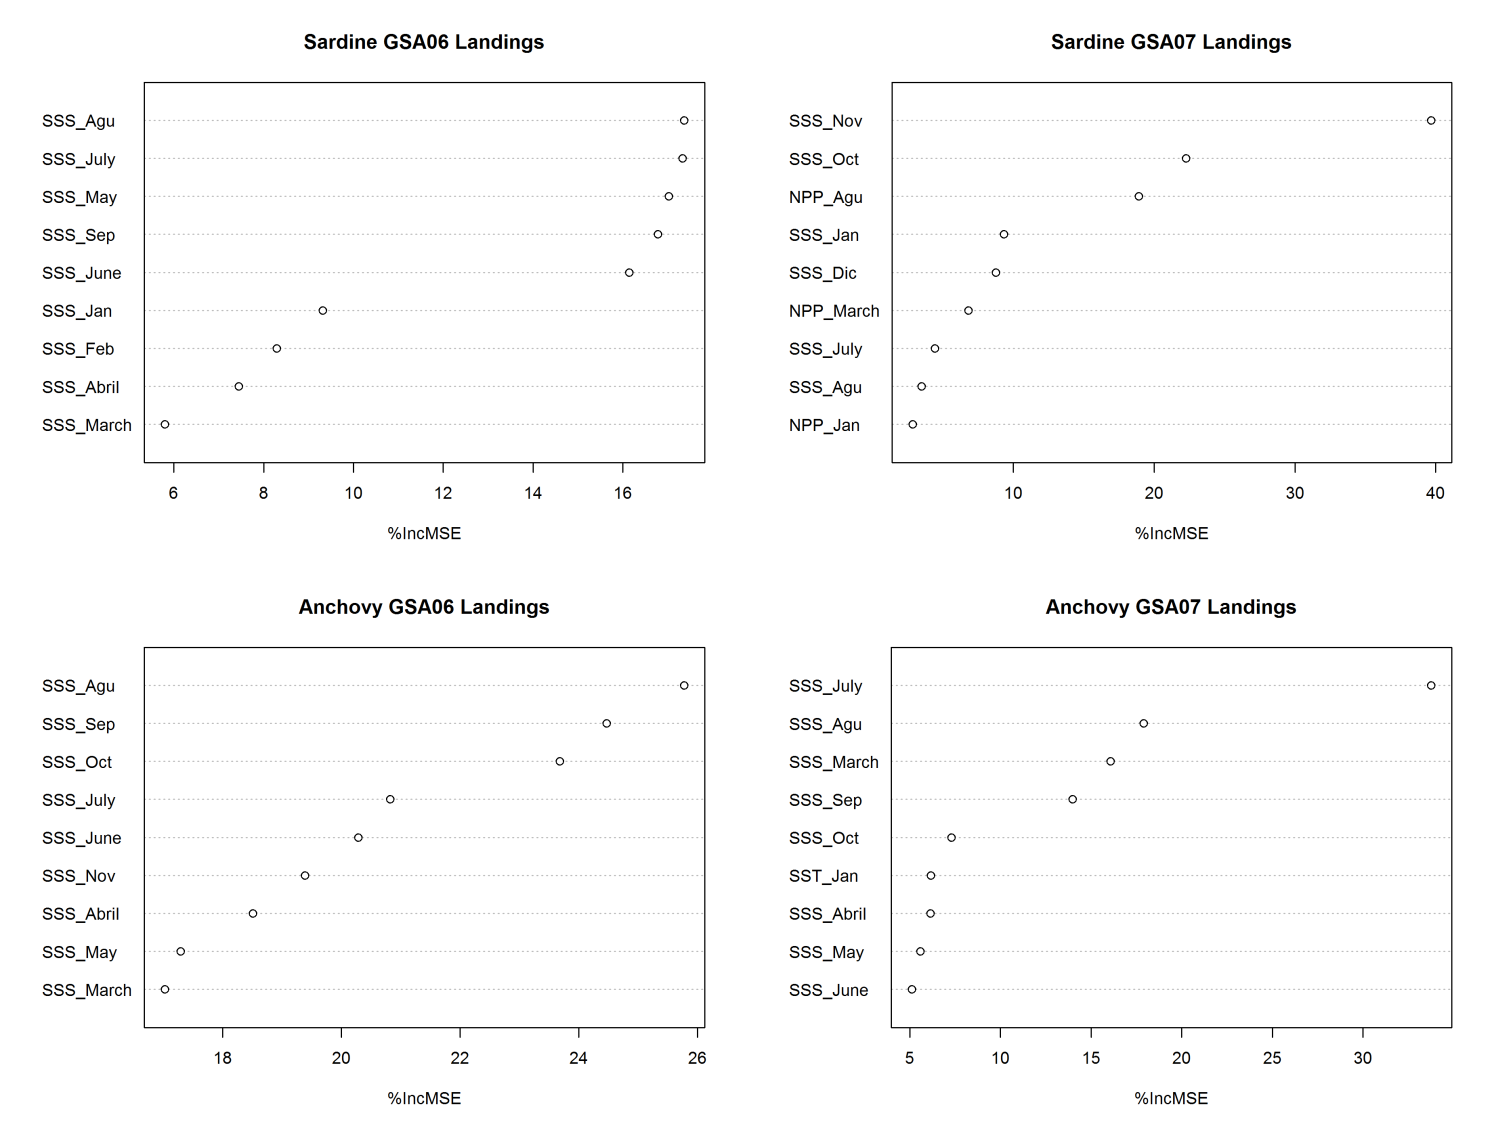


Figure S3: Variable importance analysis performed by Random Forests based on the per cent increase in mean squared error- MSE for the used variables. Random Forests were performed for European sardine (*Sardina pilchardus*) and anchovy (*Engraulis encrasicolus*) official landings in the Geographical Sub-Area 06 and 07 from 2003 to 2016. Predictors used were Sea Surface Temperature (SST in °C), Sea Surface Salinity (SSS in PSU) and Net Primary Productivity (NPP in mg/m3). Moreover, 12 temporal lags (from January to December) were tested to assess if the species were more influenced by the environmental features of the months previous the catch.


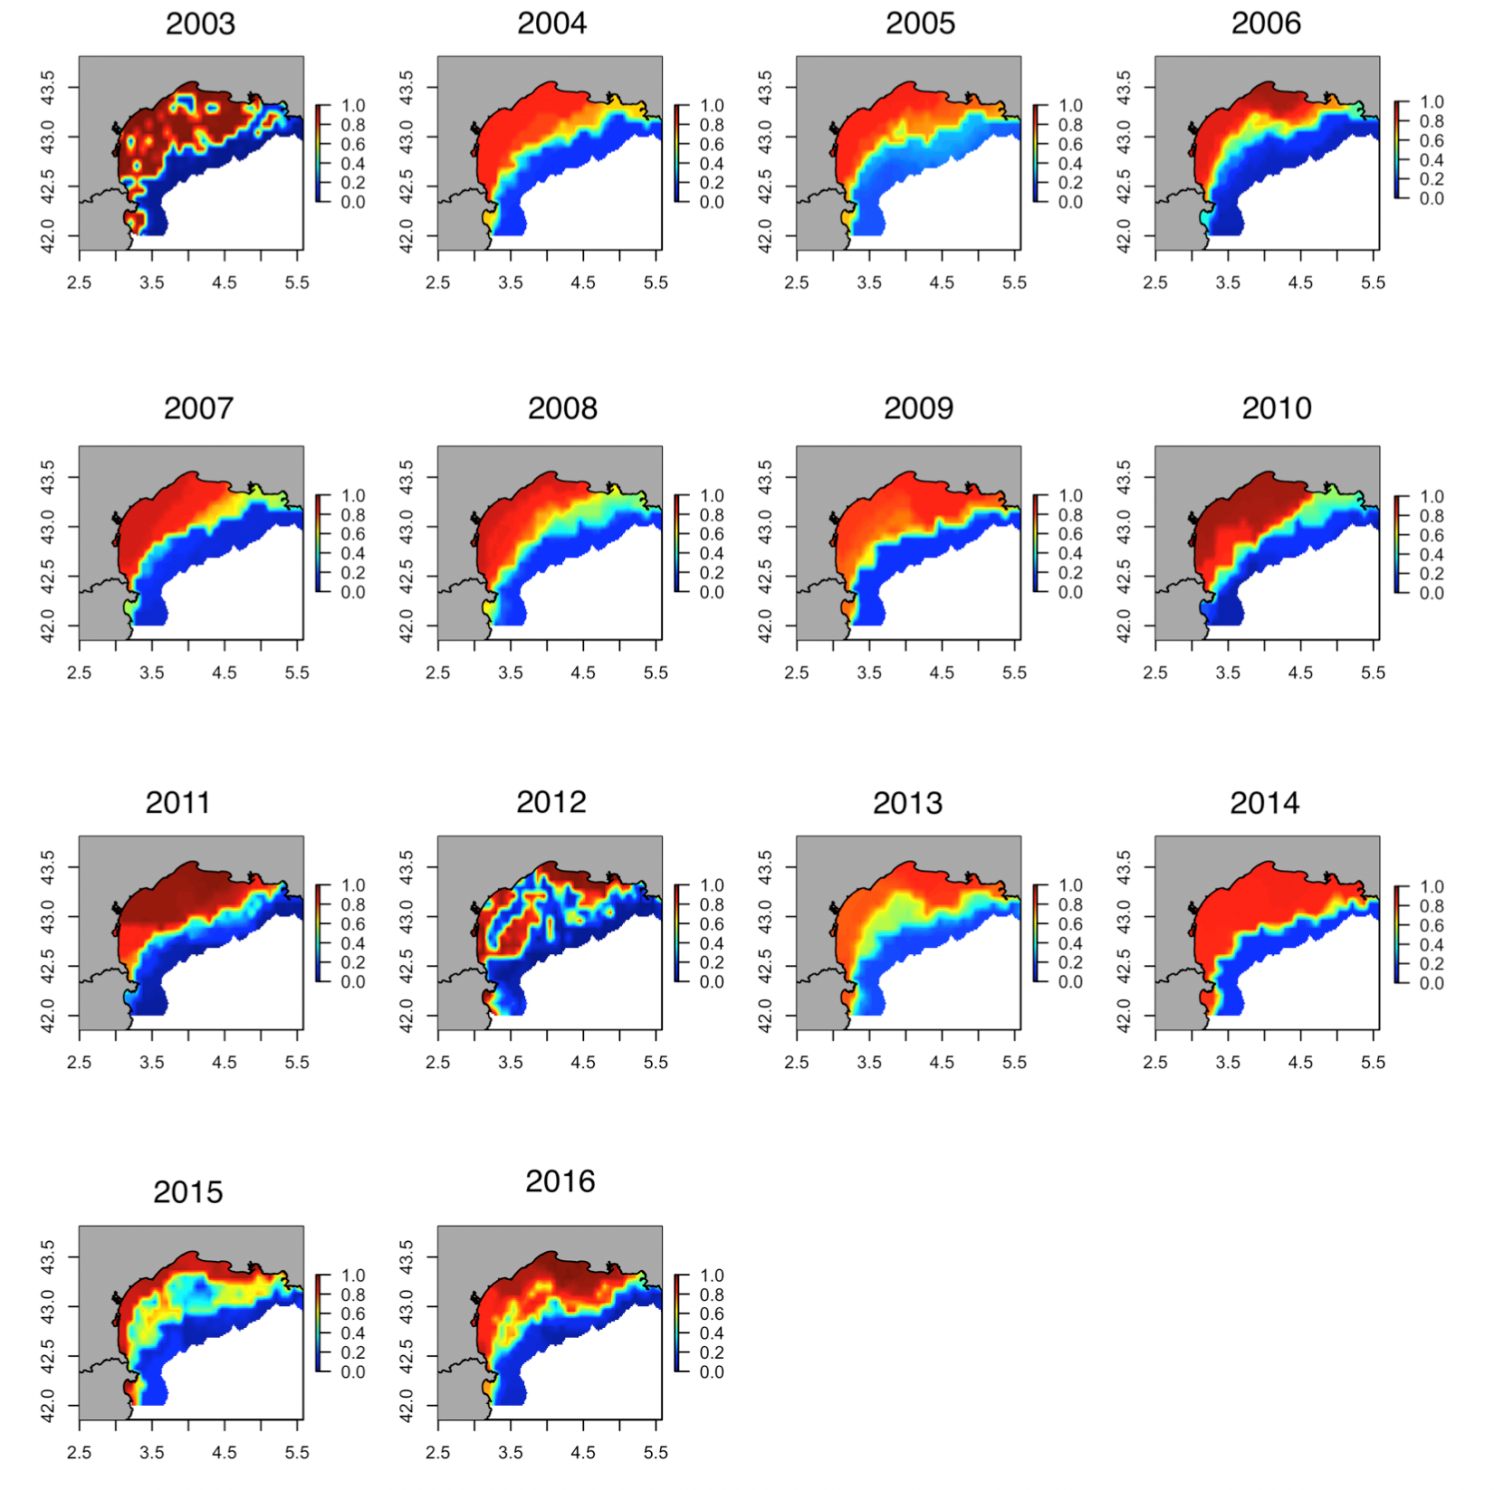


Figure S4: Spatial maps of the European sardine (*Sardina pilchardus*) occurrence collected during the MEDITS surveys from 2003-2016 obtained with RAC-BRT models in the Geographical Sub-Area 07.


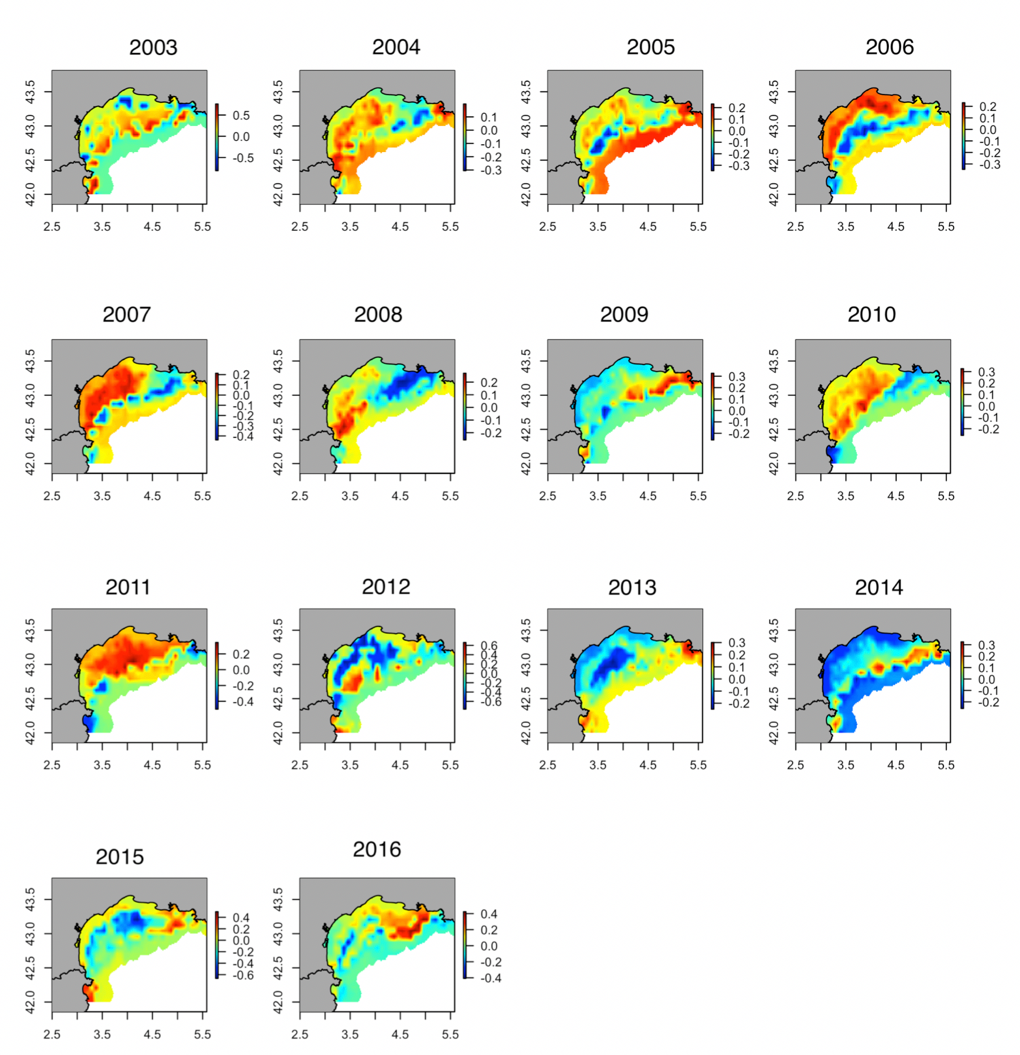


Figure S5. Spatial maps of the inter-annual deviation of the European sardine (*Sardina pilchardus*) occurrence collected during the MEDITS surveys from 2003-2016 obtained with RAC-BRT models in the Geographical Sub-Area 07.

**
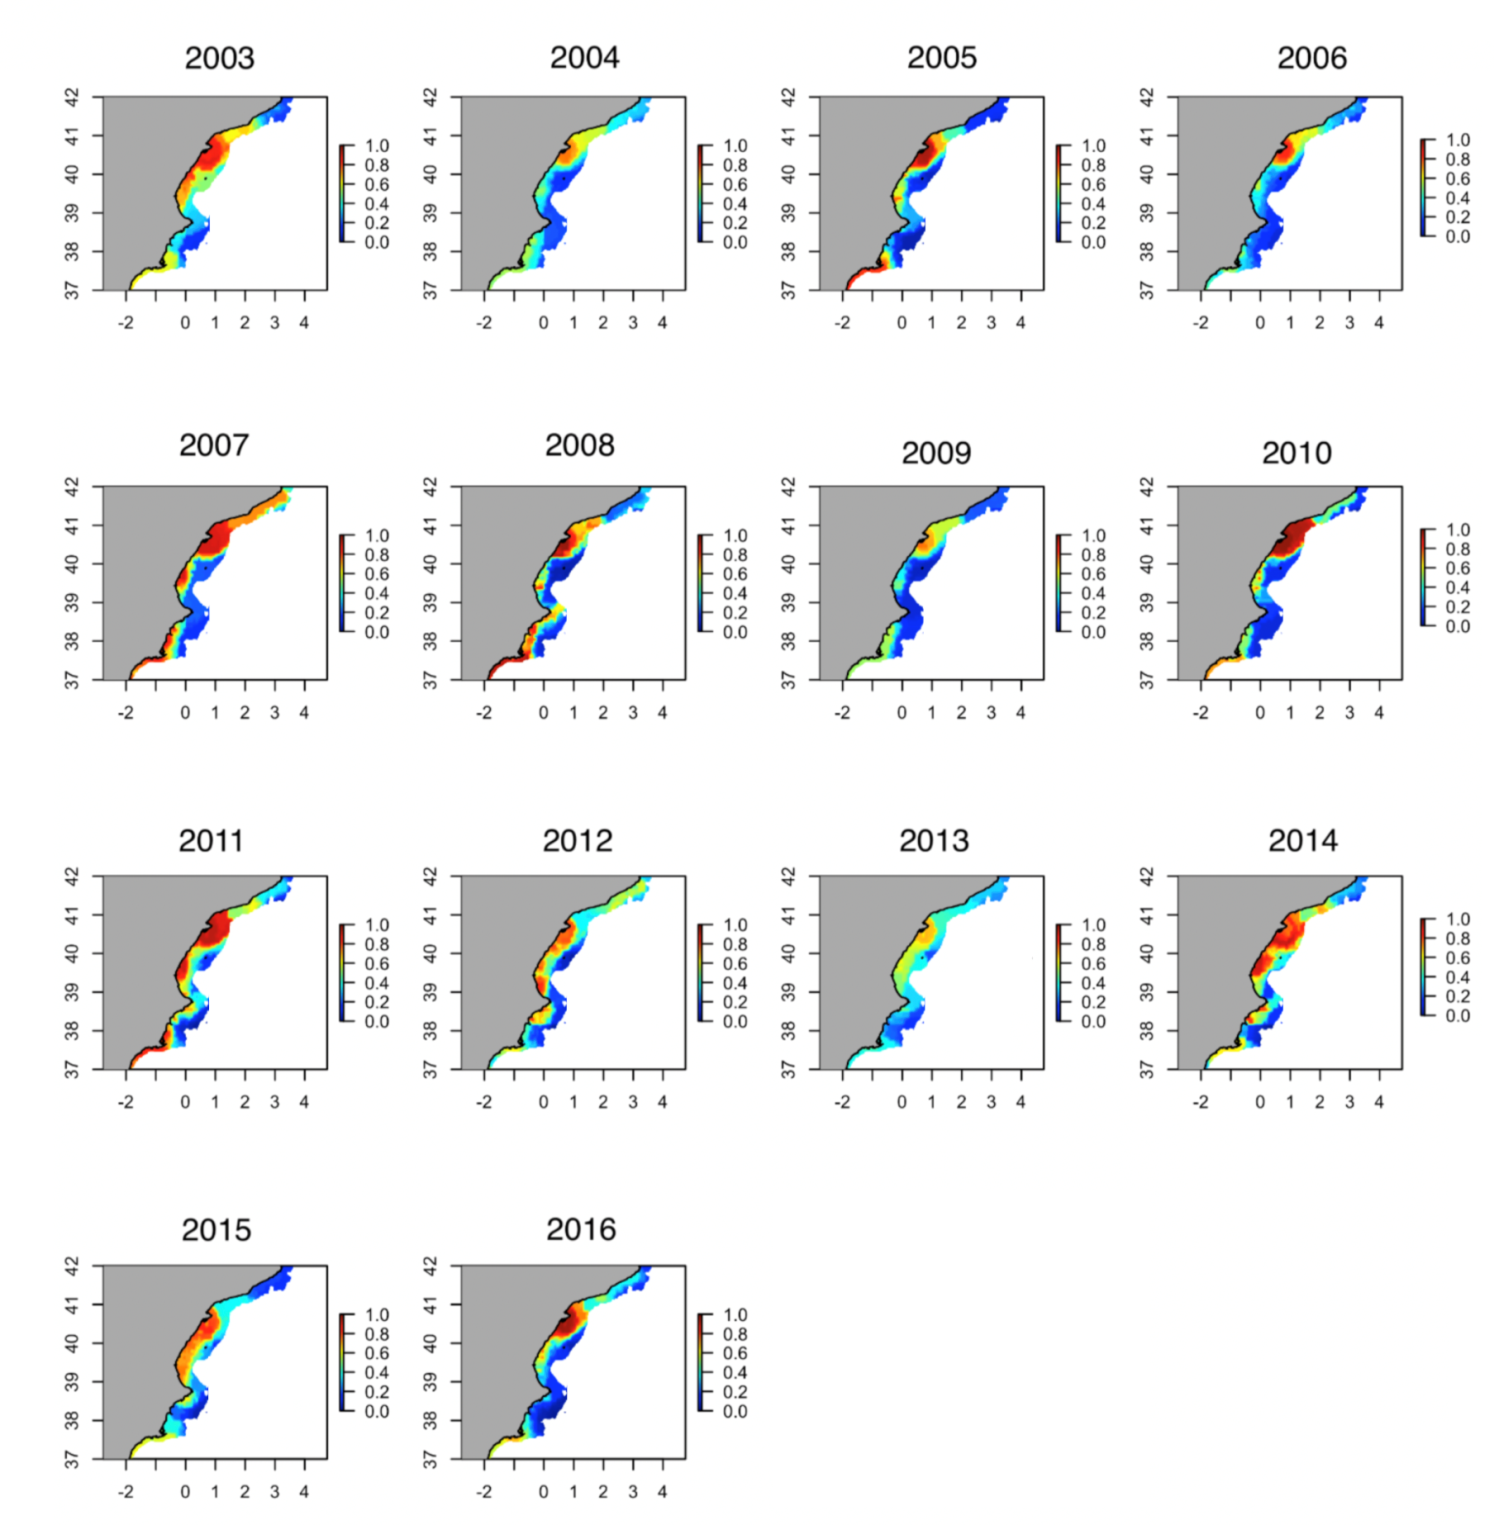
**

Figure S6: Spatial maps of the European sardine (*Sardina pilchardus*) occurrence collected during the MEDITS surveys from 2003-2016 obtained with RAC-BRT models in the Geographical Sub-Area 06.

**
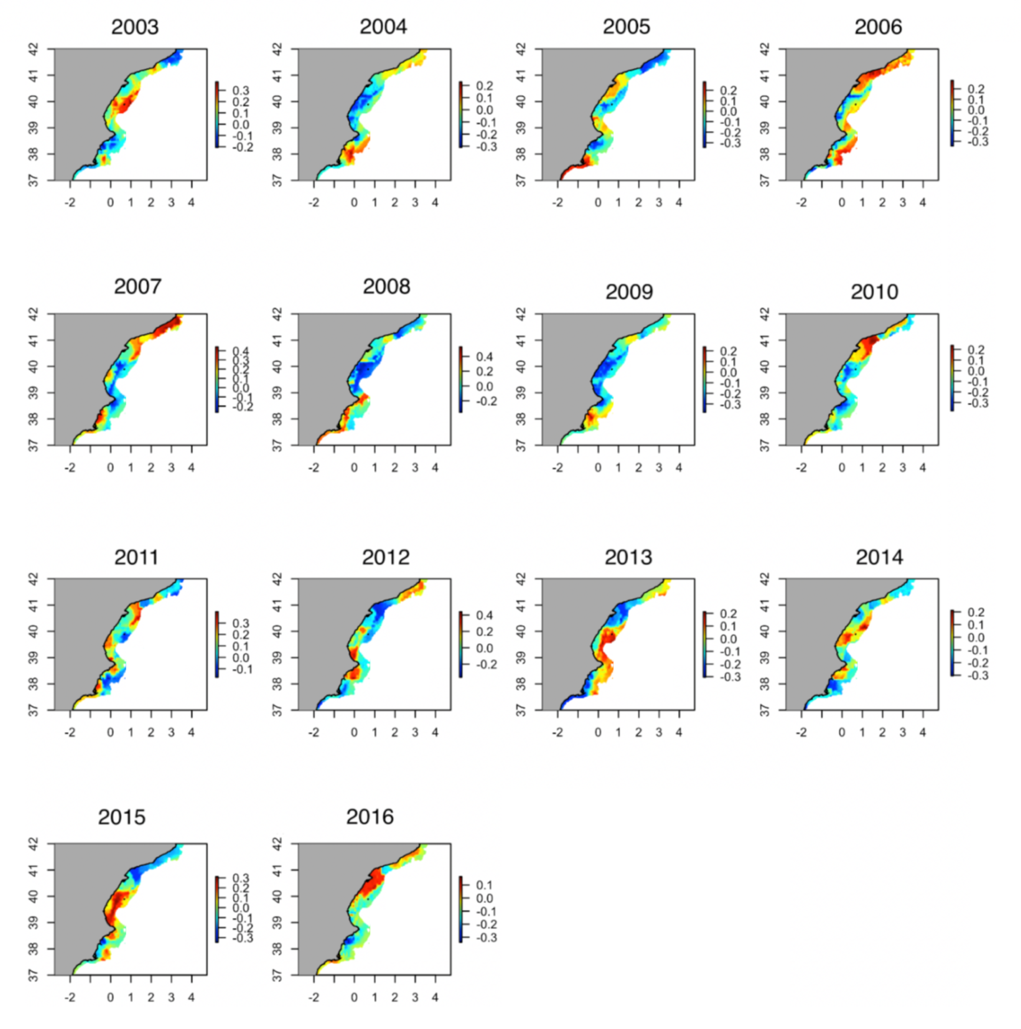
**

Figure S7. Spatial maps of the inter-annual deviation of the European sardine (*Sardina pilchardus*) occurrence collected during the MEDITS surveys from 2003-2016 obtained with RAC-BRT models in the Geographical Sub-Area 06.

**
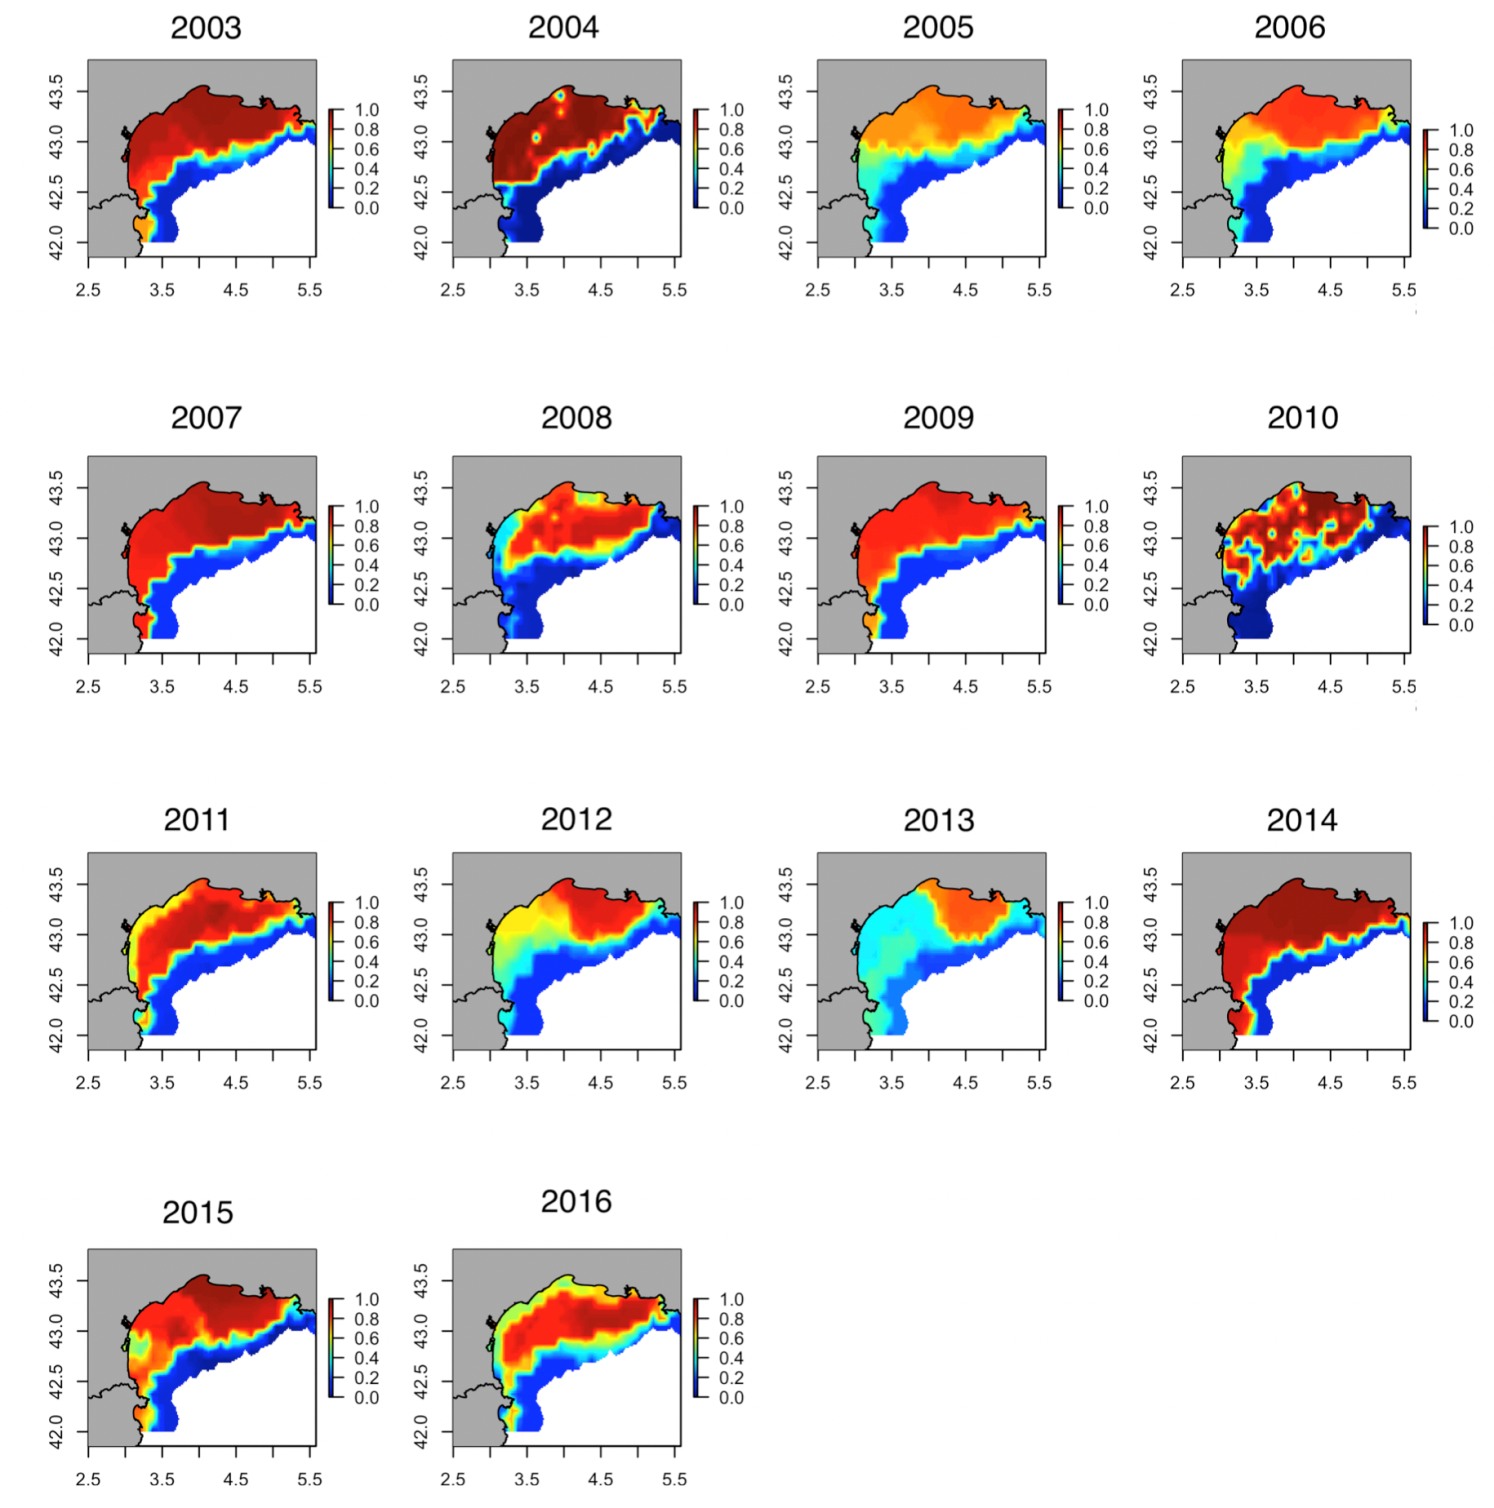
**

Figure S8: Spatial maps of the European anchovy (*Engraulis encrasicolus*) occurrence collected during the MEDITS surveys from 2003-2016 obtained with RAC-BRT models in the Geographical Sub-Area 07.


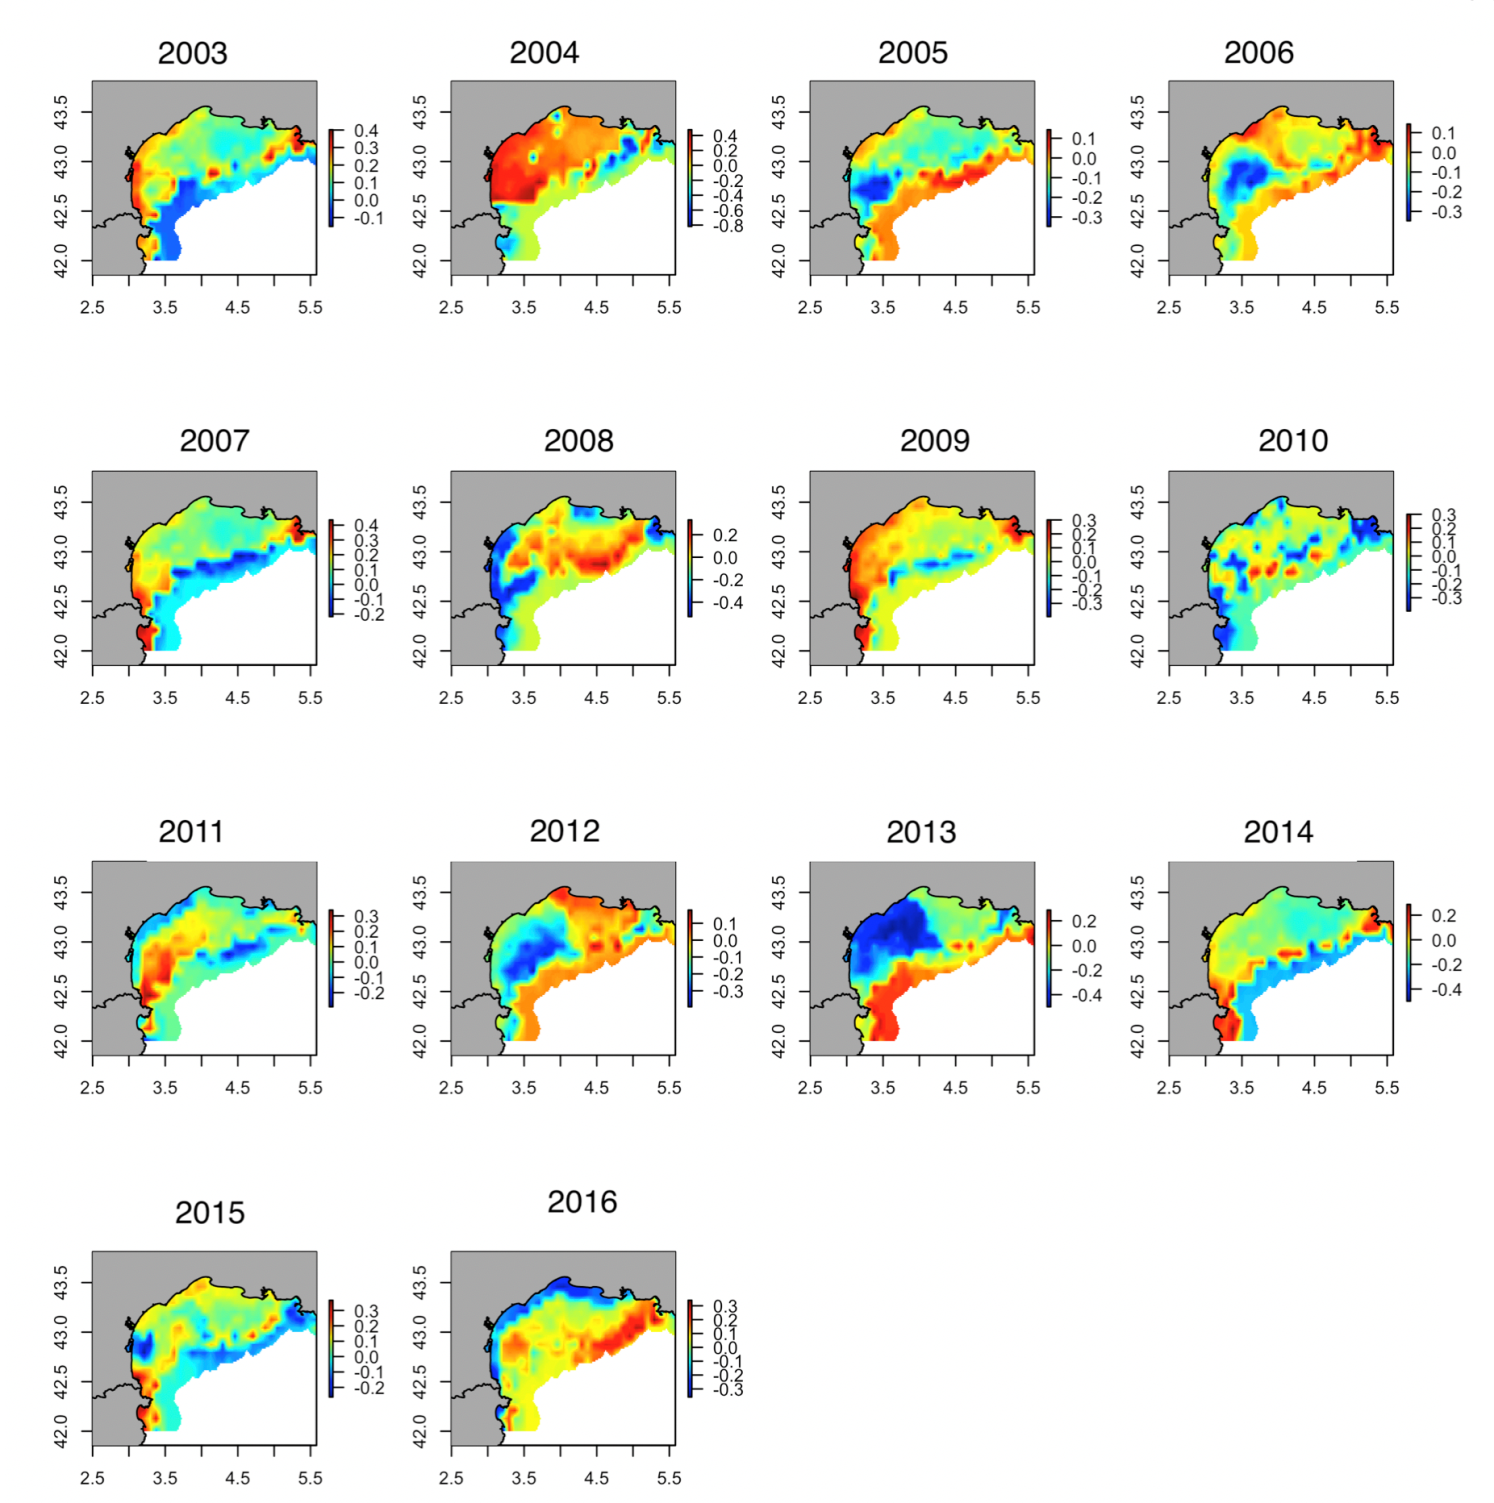


Figure S9. Spatial maps of the inter-annual deviation of the European anchovy (*Engraulis encrasicolus*) occurrence collected during the MEDITS surveys from 2003-2016 obtained with RAC-BRT models in the Geographical Sub-Area 07.


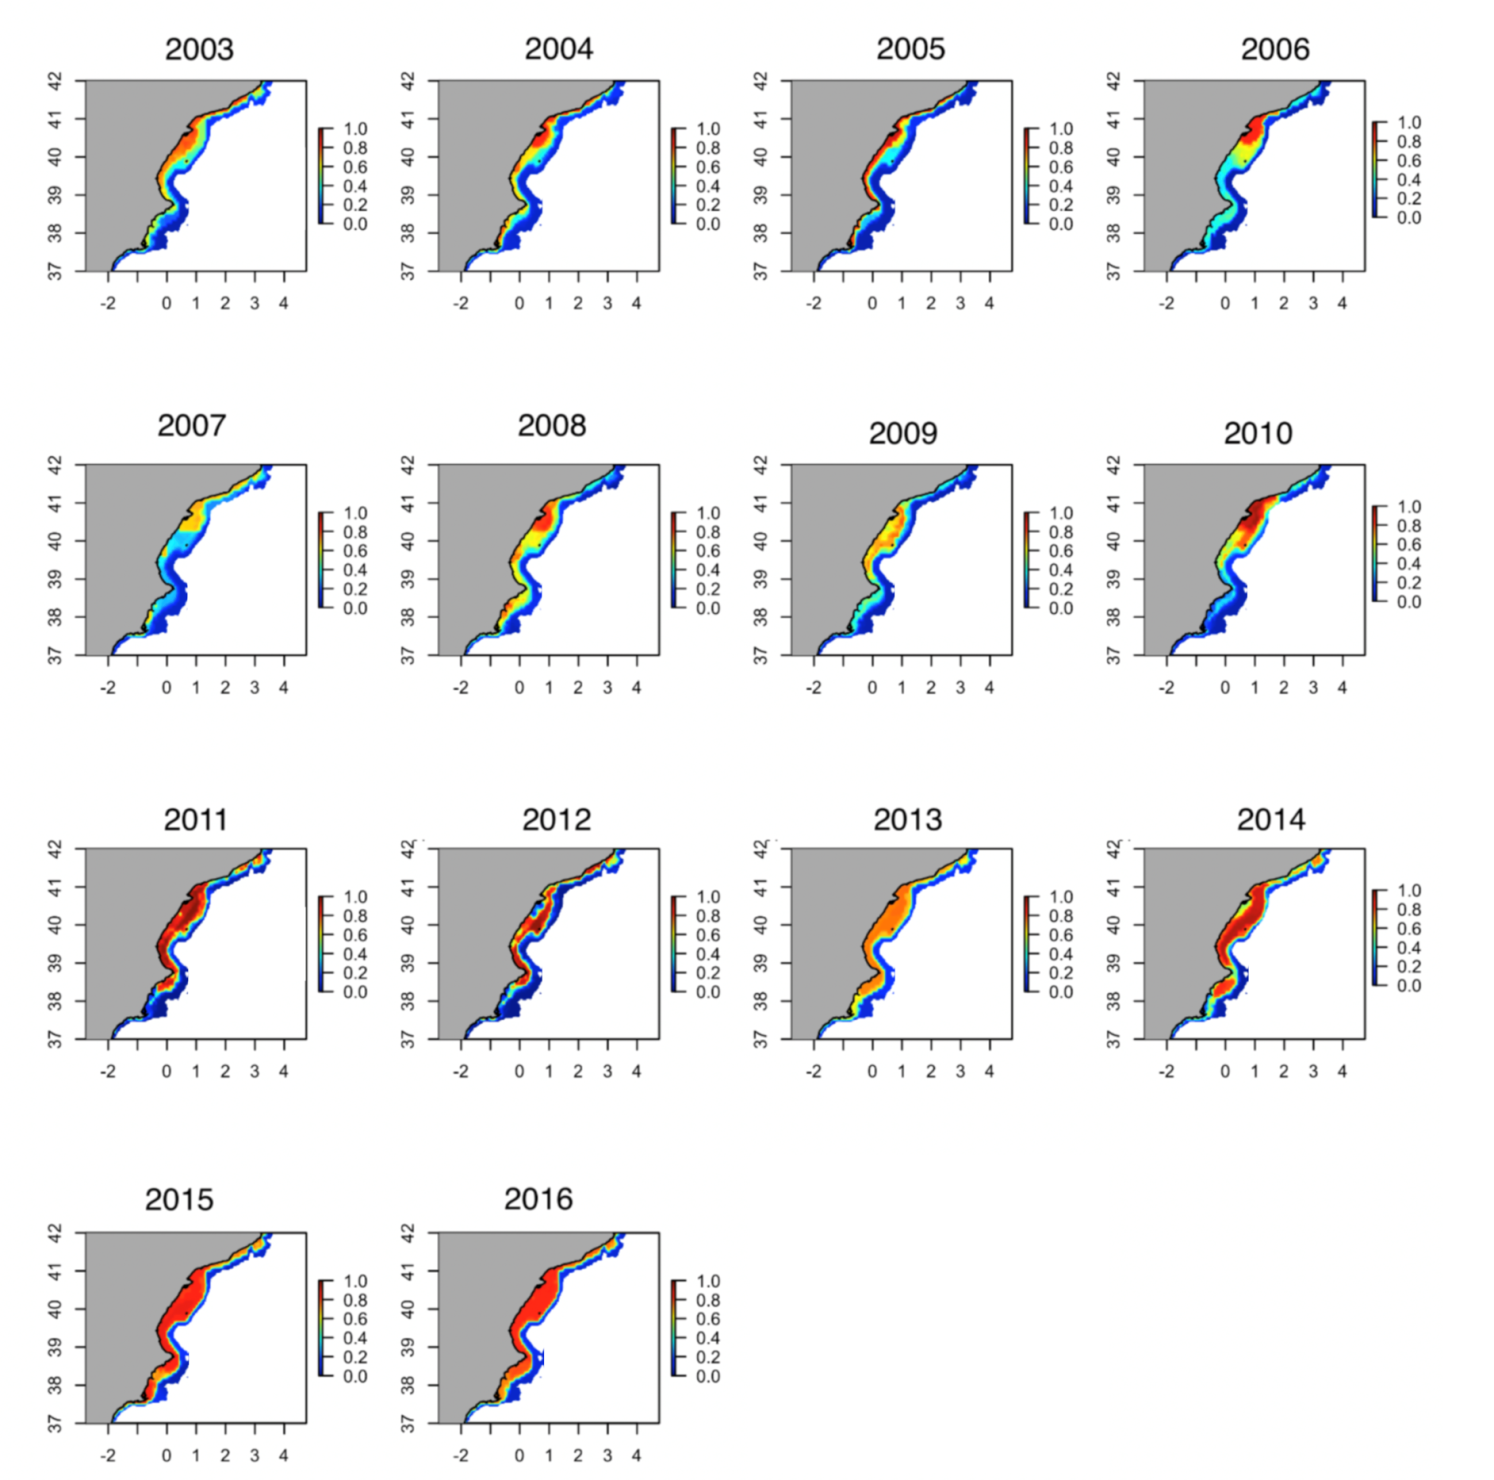


Figure S10: Spatial maps of the European anchovy (*Engraulis encrasicolus*) occurrence collected during the MEDITS surveys from 2003-2016 obtained with RAC-BRT models in the Geographical Sub-Area 06.


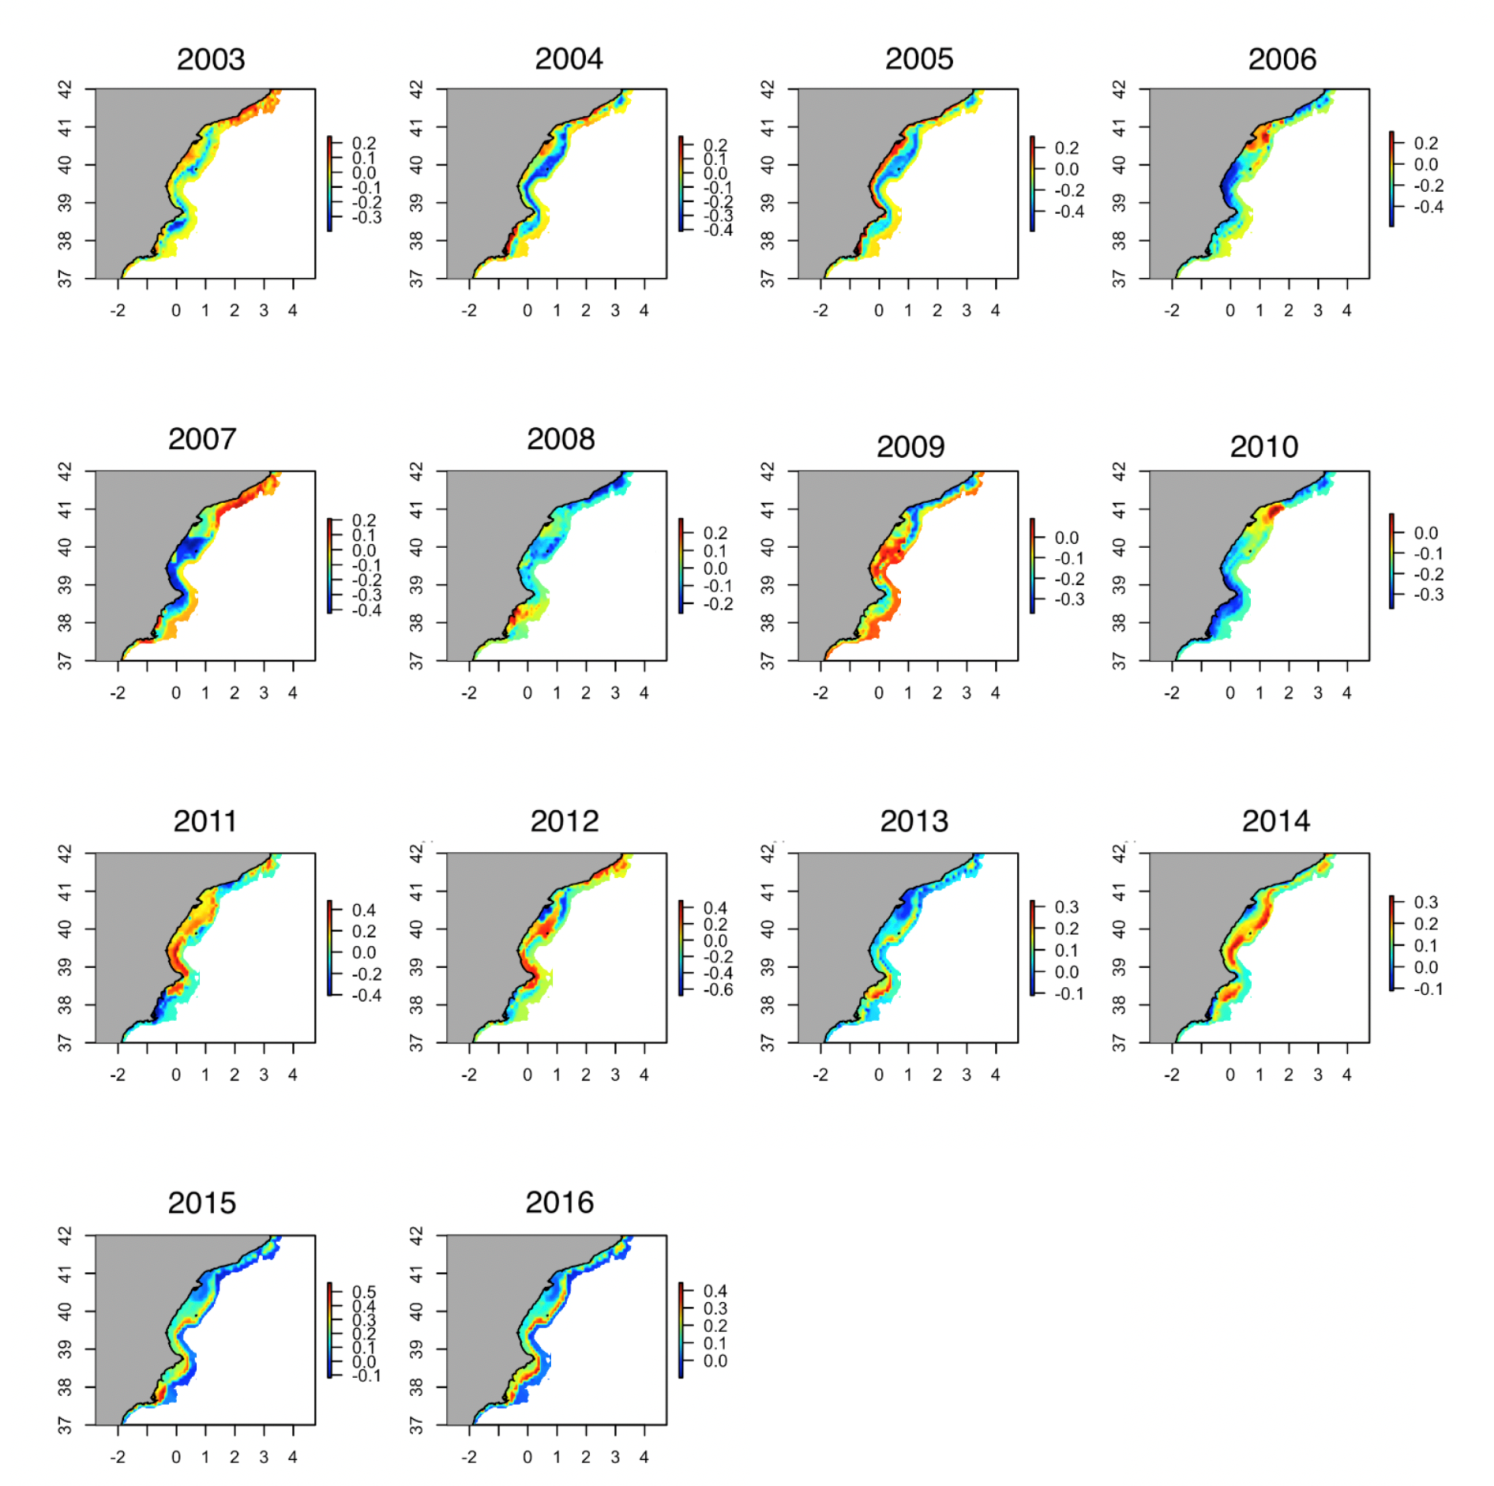


Figure S11. Spatial maps of the inter-annual deviation of the European anchovy (*Engraulis encrasicolus*) occurrence collected during the MEDITS surveys from 2003-2016 obtained with RAC-BRT models in the Geographical Sub-Area 06.


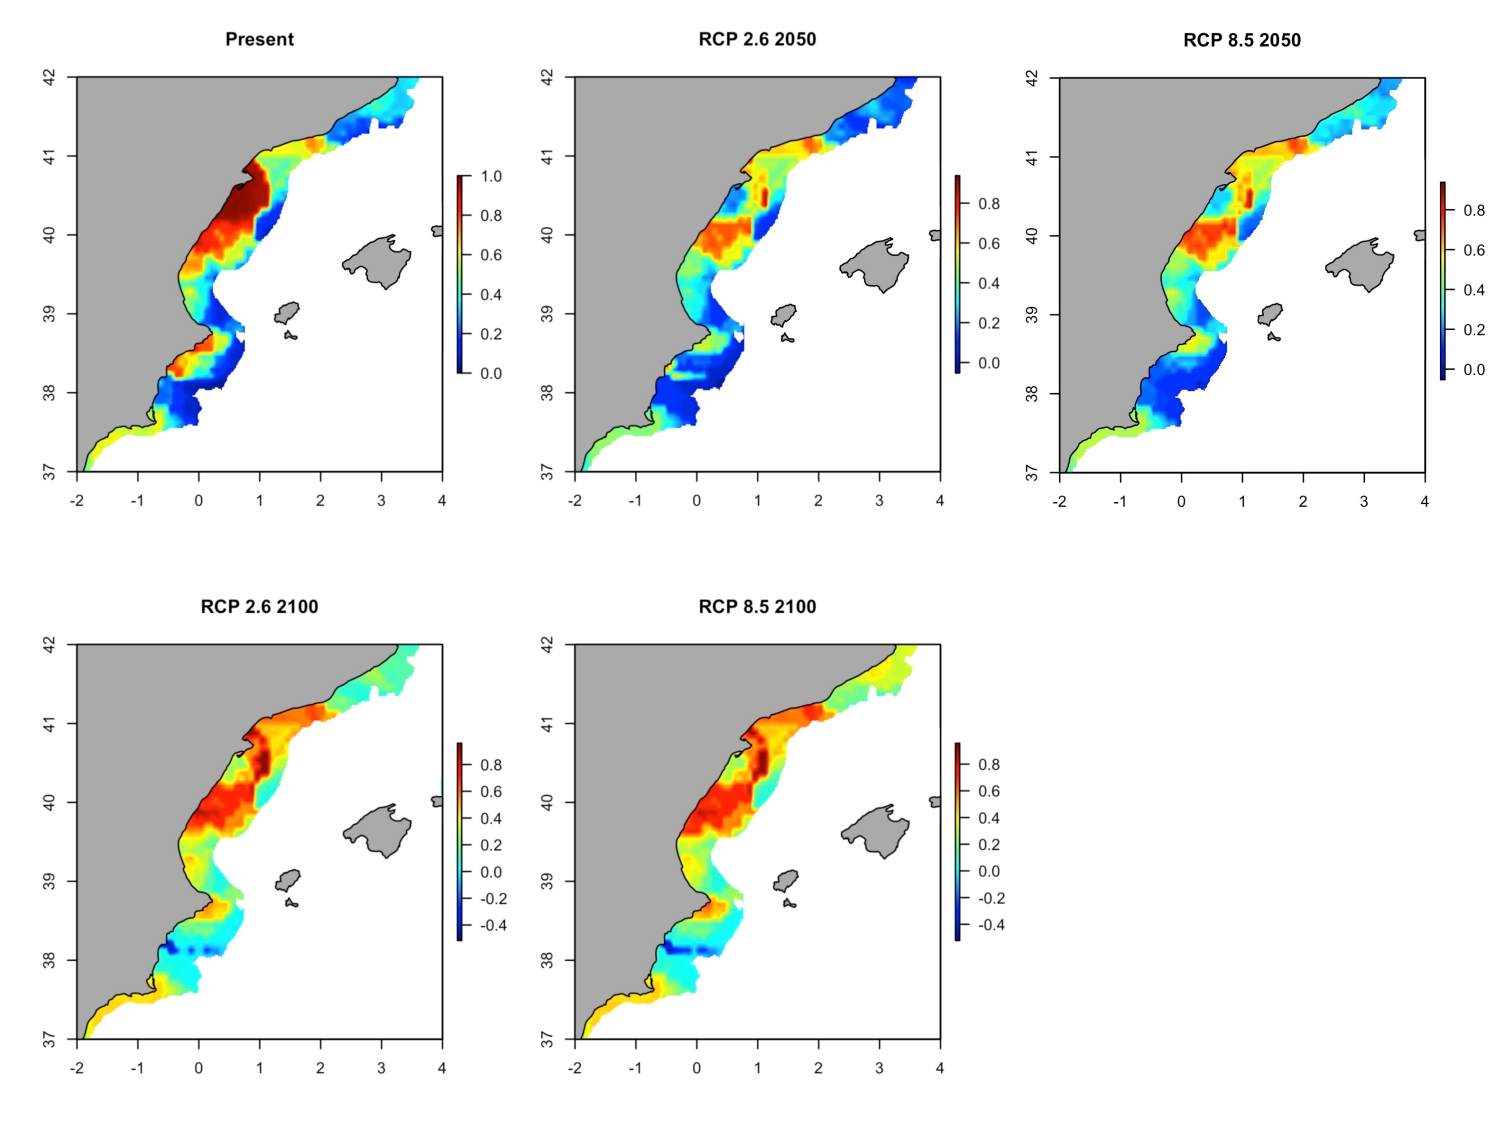


Figure S12. Spatial maps of the inter-annual deviation of the European sardine (*Sardina pilchardus*) occurrence collected during the MEDITS surveys for the present and under IPCC scenarios in the Geographical Sub-Area 06 obtained with RAC-BRT models.


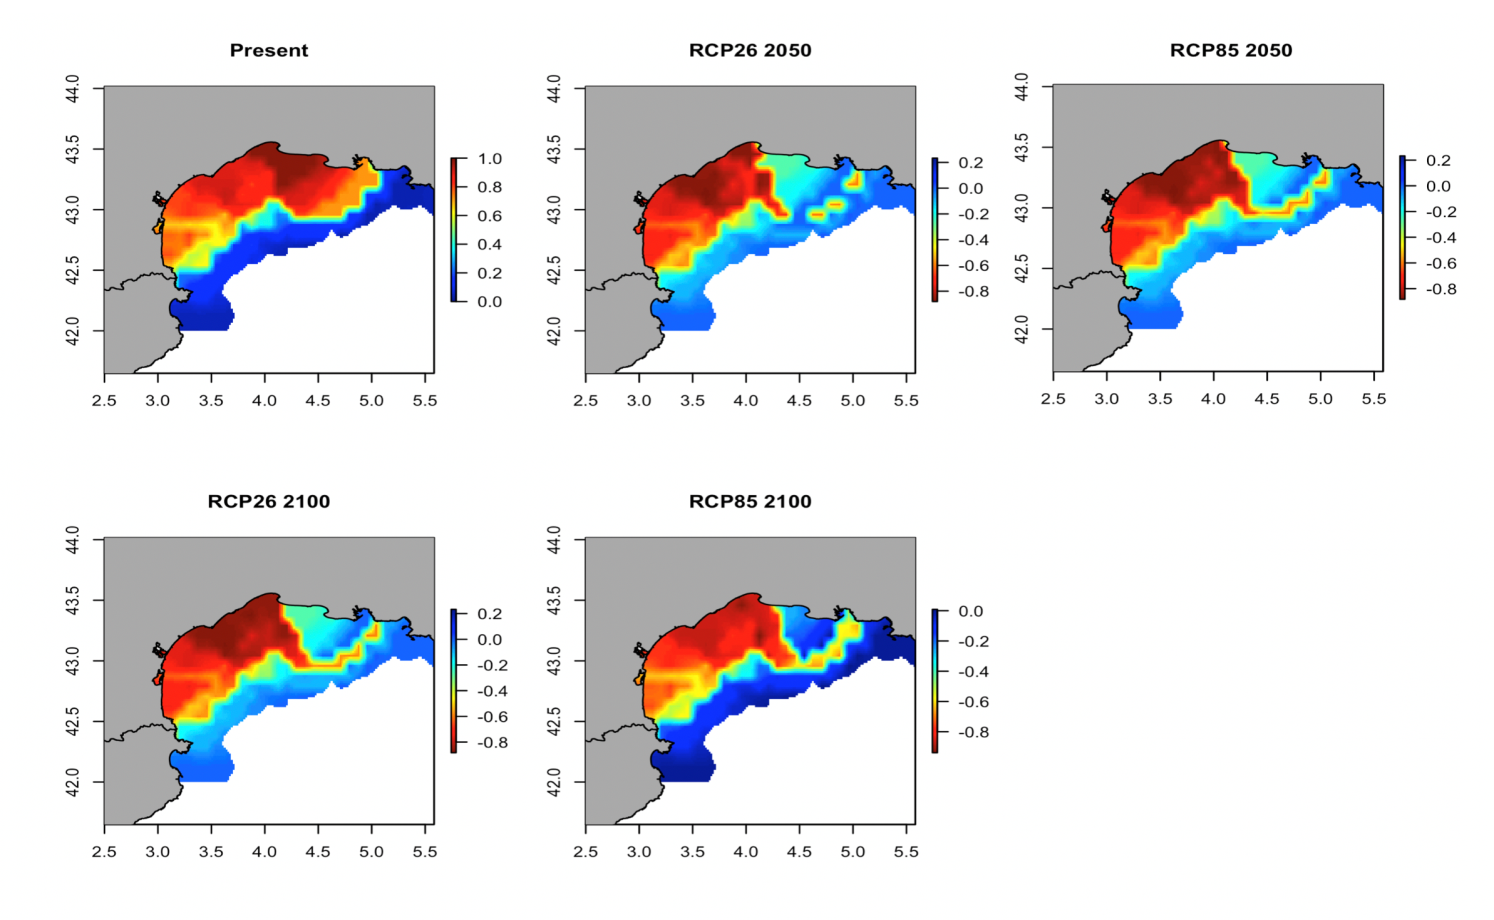


Figure S13. Spatial maps of the inter-annual deviation of the European sardine (*Sardina pilchardus*) occurrence collected during the MEDITS surveys for the present and under IPCC scenarios in the Geographical Sub-Area 07 obtained with RAC-BRT models.


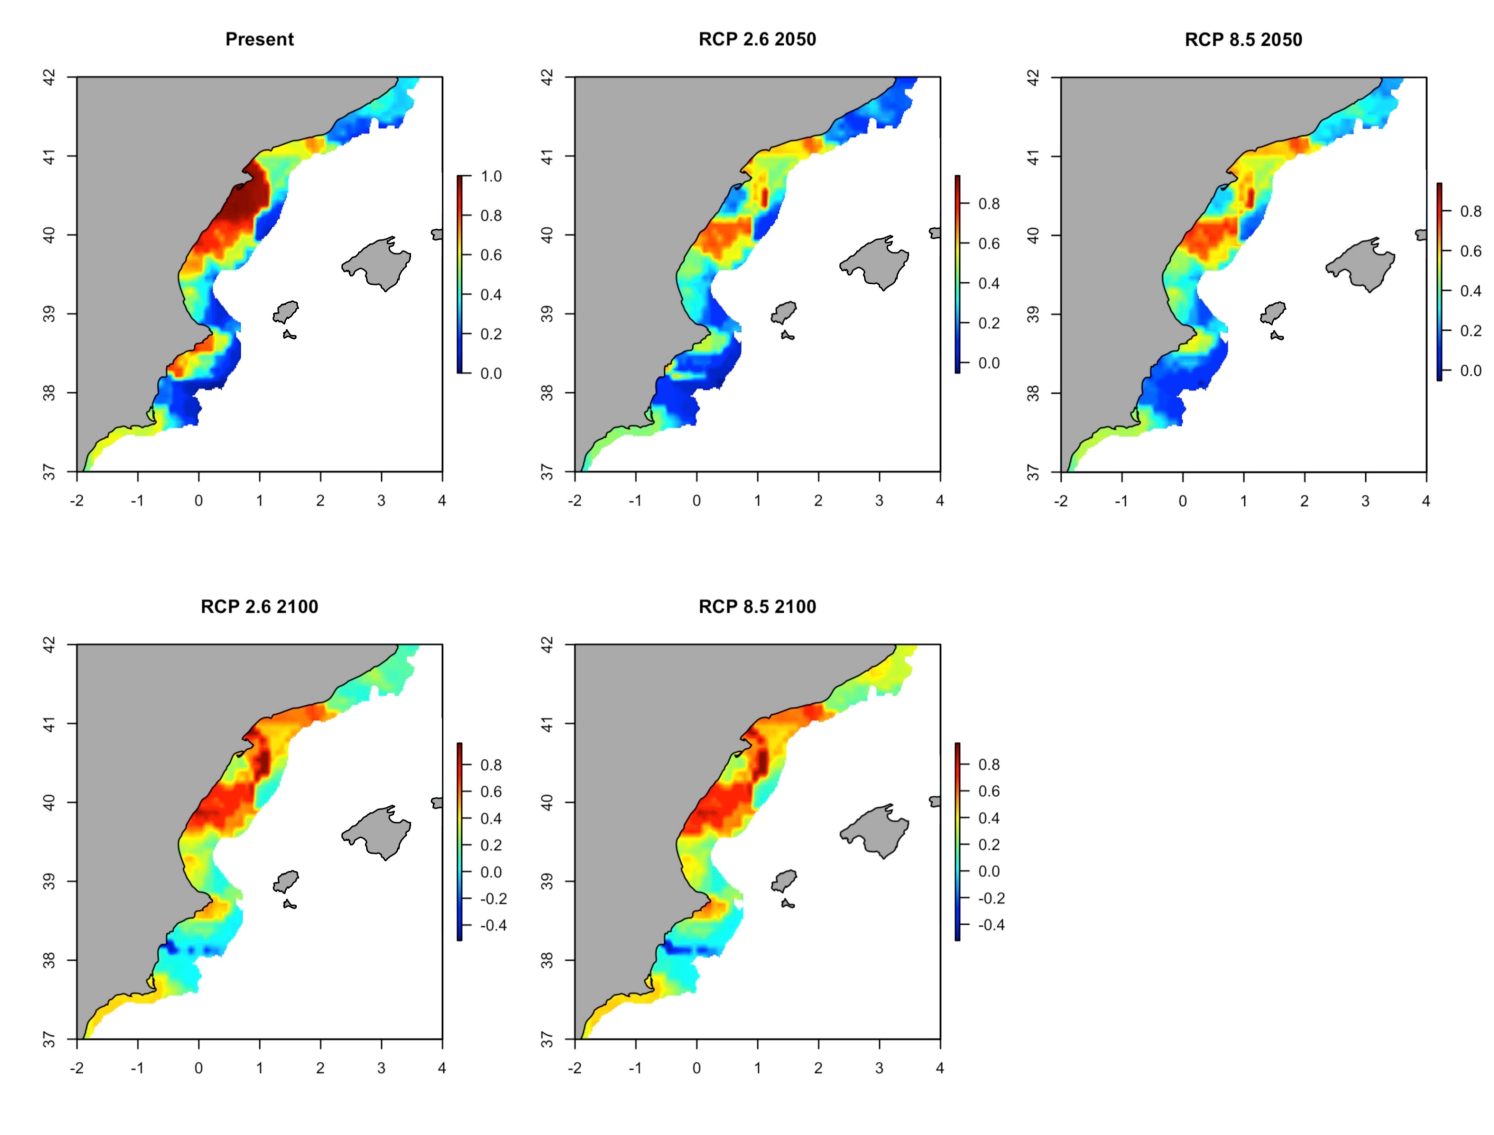


Figure S14. Spatial maps of the inter-annual deviation of the European anchovy (*Engraulis encrasicolus*) occurrence collected during the MEDITS surveys for the present and under IPCC scenarios in the Geographical Sub-Area 06 obtained with RAC-BRT models.


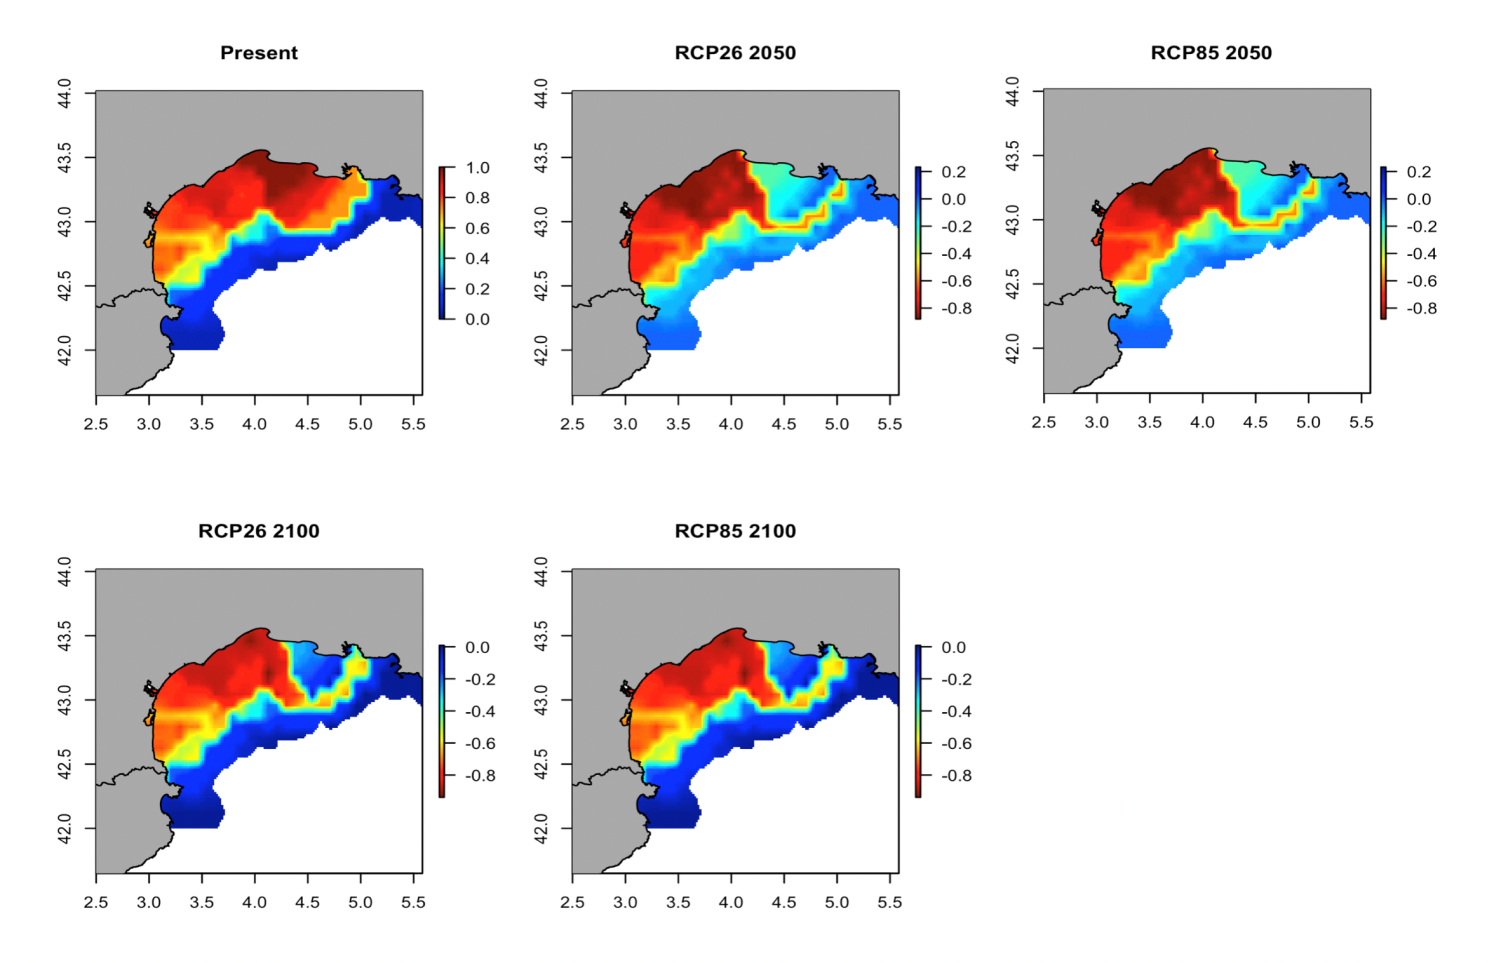


Figure S15. Spatial maps of the inter-annual deviation of the European anchovy (*Engraulis encrasicolus*) occurrence collected during the MEDITS surveys for the present and under IPCC scenarios in the Geographical Sub-Area 07 obtained with RAC-BRT models.
